# Supplementary material for: First organic fluorescence immunoassay for the detection of Enterobacter cloacae in food matrixes
Source: Royal Society of Chemistry journal article supplement (doi:10.1039/d4ay00289j), 2024-01-01
Supplement: d4ay00289j1.pdf [file d4ay00289j1.pdf]

## First Organic Fluorescent Immunoassay for the Detection of *Enterobacter cloacae* in Food Matrixes

Kathiravan Shenbagavalli<sup>a</sup>, Kannan Suganya<sup>b</sup>, Ellairaja Sundaram<sup>c</sup>,  
Marudhamuthu Murugan<sup>e\*</sup>, Vairathevar SivasamyVasantha<sup>a\*</sup>

<sup>a</sup> Department of Natural Products Chemistry, School of Chemistry, Madurai Kamaraj University, Madurai-625 021,

Tamil Nadu, India

<sup>b</sup> Central Research Laboratory, Vinayaka Mission's, Medical College and Hospital, Vinayaka Mission's Research

Foundation, Karaikal-609 609, India.

<sup>c</sup> Department of chemistry, Vivekananda College, Tiruvedakam, West, Madurai- 625234, Tamilnadu, India.

<sup>e</sup> Department of Microbial Technology, School of Biological Science, Madurai Kamaraj University, Madurai-625021, Tamil Nadu, India

**Corresponding Author\***

**E-mail:** [vasantham999@yahoo.co.in](mailto:vasantham999@yahoo.co.in)

SUPPORTING INFORMATION:

### 1. Real sample analysis

#### 1. Real sample analysis corresponding emission spectra

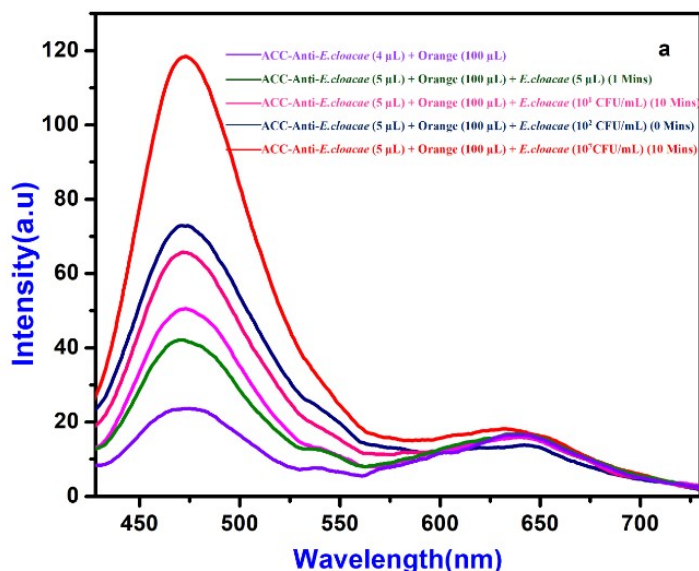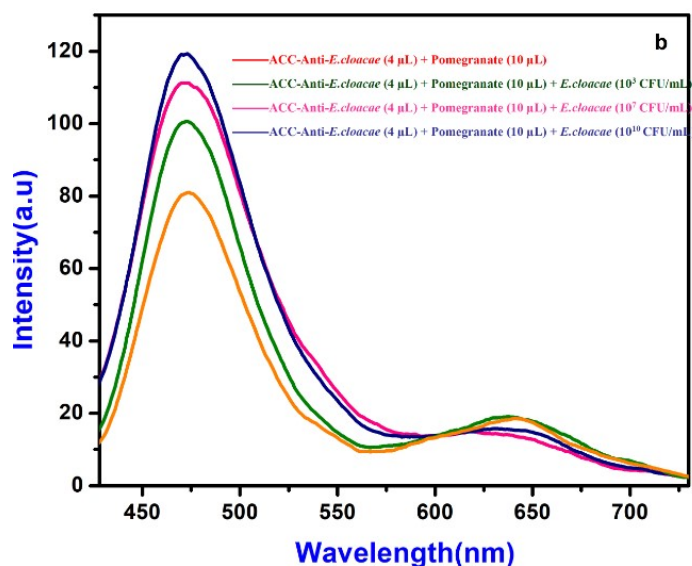

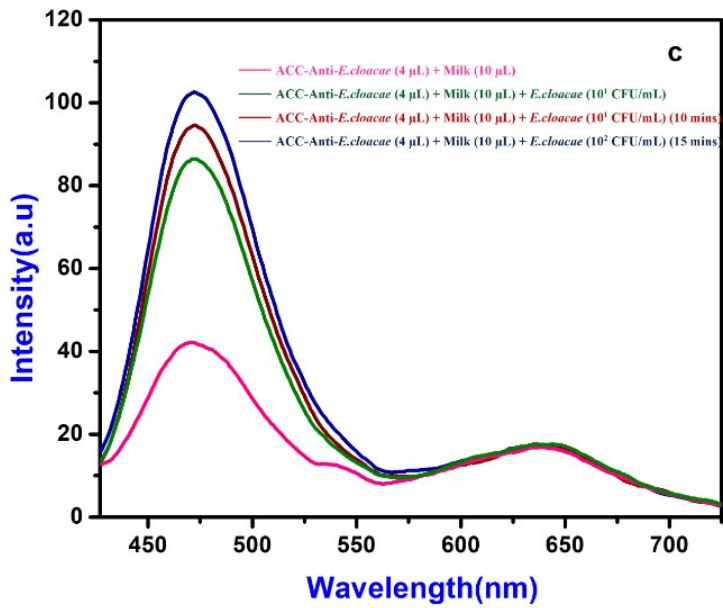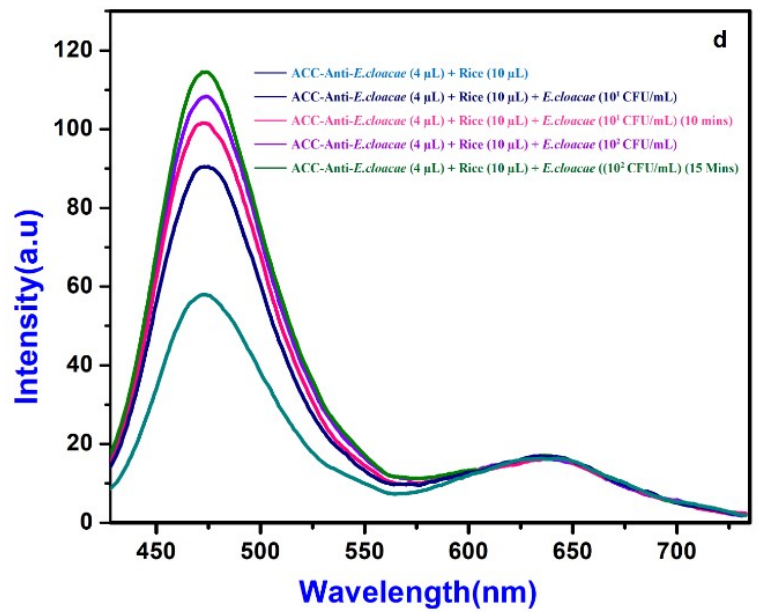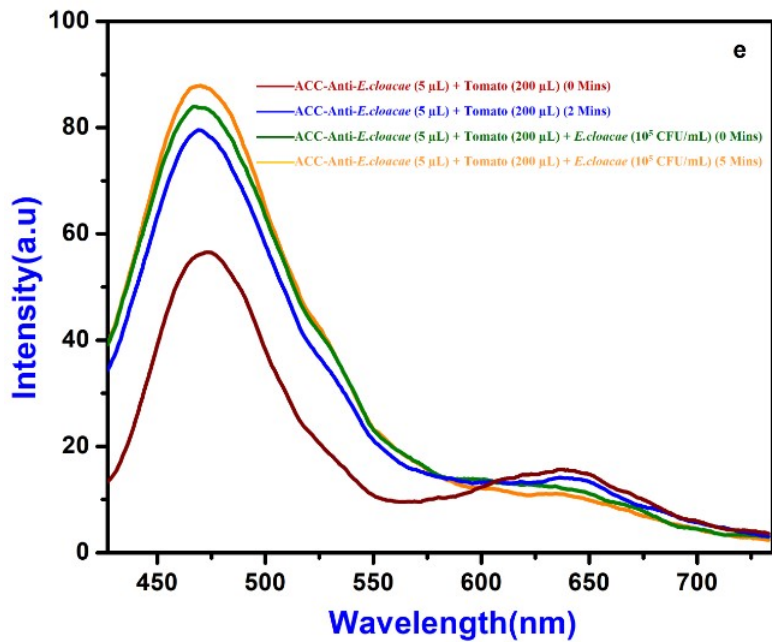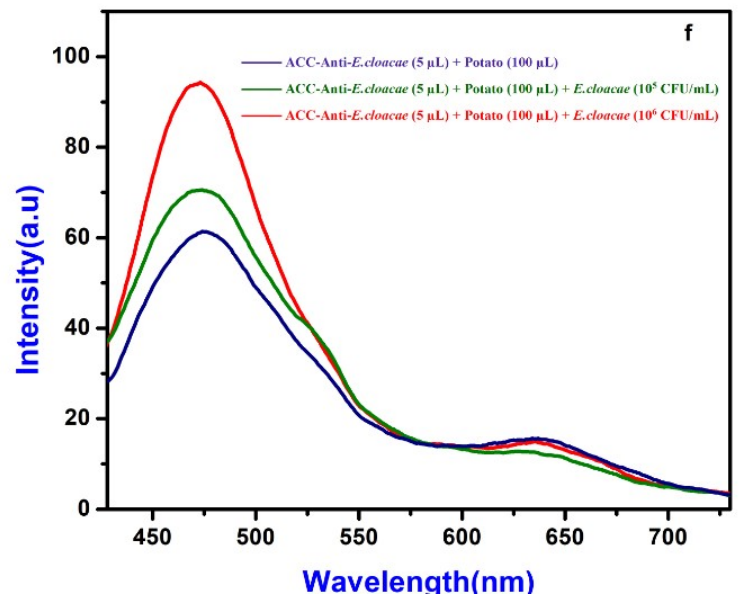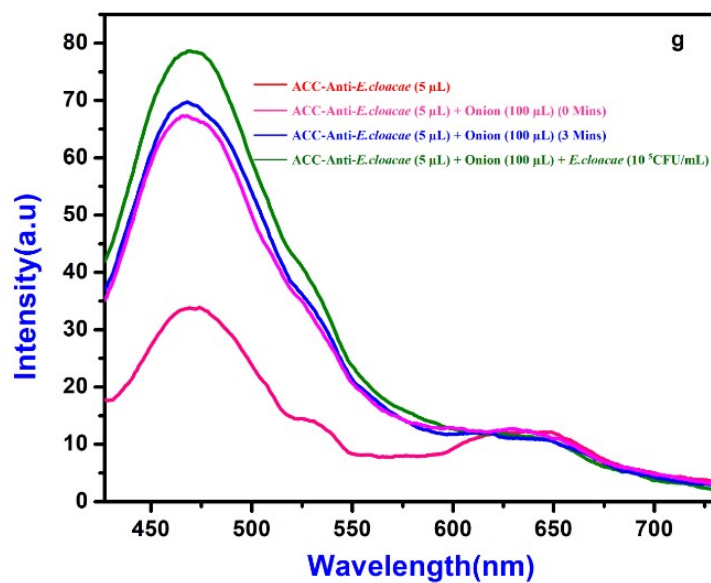

**Figure S10.** Emission responses of ACC-Anti- *E.cloacae* for the different samples from orange, pomegranate, milk, rice, tomato, potato and onion following known different concentrations spiked methods (e) [Concentration of ACC is 0.001 M; Total Concentration of ACC-Anti-*E.cloacae* is 100 mg/100 mL and ACC-Anti-*E.cloacae* is 0.005 mg/100  $\mu$ L, *E.cloacae* is 1mg/1 mL in dilution concentration (other interferences) in PBS buffer pH=7.4, incubation time is 5 mins].
